# Supplementary material
Source: MDPI journal article supplement (https://www.mdpi.com/2079-6439/11/10/85)
Supplement: s1 [file s1]

Supplementary data

# Optimization of Polyvinyl Alcohol-Based Electrospun Fibers with Bioactive or Electroconductive Phases for Tissue-Engineered Scaffolds

Zeynep Renkler <sup>1,2</sup>, Iriczalli Cruz Maya <sup>1</sup> and Vincenzo Guarino <sup>1,\*</sup>

<sup>1</sup> IPCB/CNR, Institute of Polymers, Composites and Biomaterials–Consiglio Nazionale delle Ricerche, Mostra D'Oltremare, Pad. 20, V.le J.F. Kennedy 54, 80125 Naples, Italy; nzrenkler@gmail.com (N.Z.R.); iriczalli.cruzmay@ipcb.cnr.it (I.C.M.)

<sup>2</sup> Department of Chemical, Materials and Industrial Production Engineering, University of Naples Federico II, 80125 Naples, Italy

\* Correspondence: vincenzo.guarino@cnr.it

**Table S1.** Summary of PVA based electrospun fibers.

| Sample          | Composition (w/v)   | Solvent                      | Post Treatment (w/v) |
|-----------------|---------------------|------------------------------|----------------------|
| PVA10           | 10%PVA              | H <sub>2</sub> O             | Citric Acid (10%)    |
| PVA12           | 12%PVA              | H <sub>2</sub> O             | Citric Acid (10%)    |
| PVA(+PEO)       | 10%PVA-0,1%PEO      | H <sub>2</sub> O             | Citric Acid (10%)    |
| PVA(+Gelatin)   | 8%PVA-4%Gelatin     | H <sub>2</sub> O: AcOH (2:1) | EDC:NHS (7.5%) *     |
| PVA(+PEDOT:PSS) | 7%PVA-1.2%PEDOT:PSS | H <sub>2</sub> O             | Citric Acid (10%)    |
| PVA(+PVP)       | 6%PVA-6%PVP         | H <sub>2</sub> O             | Citric Acid (10%)    |

\* EDC/NHS solutions (7.5 wt.%) were prepared with the ratio of EDC/NHS was 2/1 (w/w) and added into ethanol solution (VEthanol/VH<sub>2</sub>O =95/5).

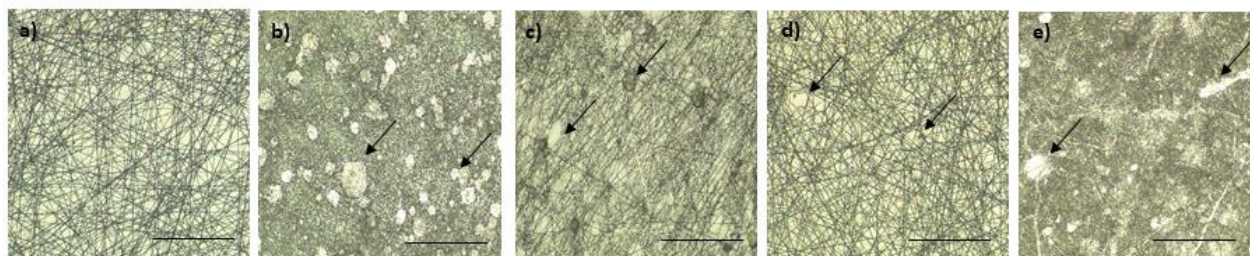

**Figure S1.** Comparison of optical images of electrospun PVA fibers produced by using different process parameters (flow rate, Voltage, Electrode gap): a) 0,3ml/h, 20kV, 25cm; b) 0.1ml/h, 20kV, 25cm; c) 0,3 ml/h, 18kV, 25 cm; d) 0,3 ml/h, 22kV, 25 cm and e) 0,3ml/h, 20kV, 15cm. (Scale bar 50μm). Black arrows indicate the presence of defects.

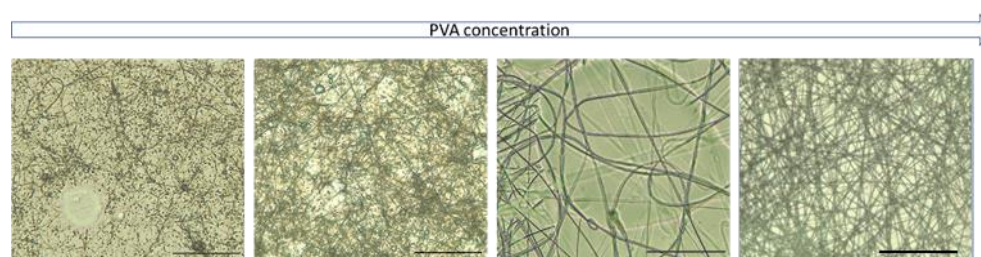

**Figure S2.** Optical images of electrospun fibers from PVA aqueous solutions at different concentrations: a) 6% w/v and b) 8% - beaded fibres; c) 10% w/v and d) 12% w/v - beadless fibers (Scale bar: 50μm).

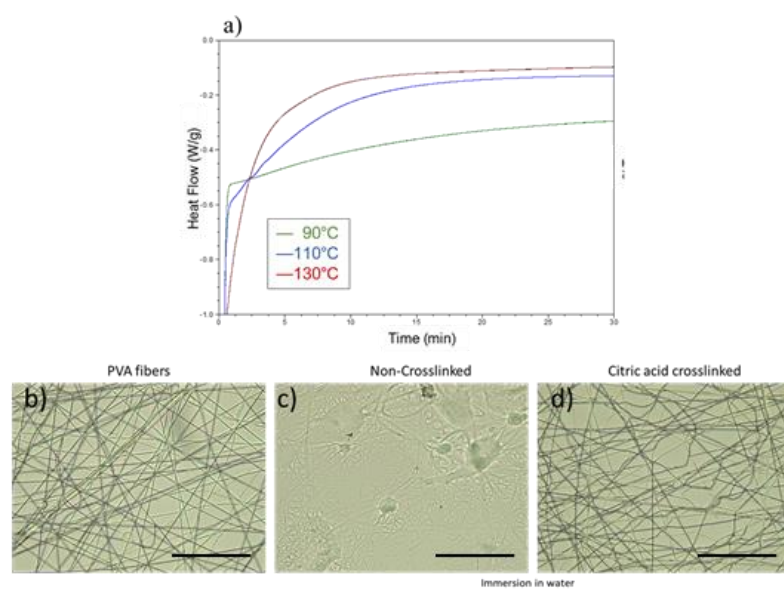

**Figure S3.** Thermal crosslinking of PVA/PEO nanofibers: (a) isothermal analysis at 90°C (green), 110°C (blue), 130°C (red) and (b) optical images of PVA fibers before (b) and after immersion in water of PVA fibers non-crosslinked (c), and PVA crosslinked (d) fibers. (Scale bar: 50 $\mu$ m).
